# Supplementary material
Source: publisher site journal article supplement (https://www.dovepress.com/article/431224)
Supplement: Supplementary file 1 [file get_supplementary_file.php]

Appendix 1

Assessment of quality of included studies using the Mixed Method Appraisal Tool (MMAT).

| Category of study designs | Methodological quality criteria | Bibliographic Details | | | | | |
| --- | --- | --- | --- | --- | --- | --- | --- |
| Mixed methods studies | | Randomized controlled trial studies | | Non-randomized controlled trial studies | |
| [33] | [37] | [34] | [32] | [36] | [35] |
| 1. Qualitative | 1.1. Is the qualitative approach appropriate to answer the research question? | Yes | Yes |  |  |  |  |
| 1.2. Are the qualitative data collection methods adequate to address the research question? | Yes | Yes |  |  |  |  |
| 1.3. Are the findings adequately derived from the data? | Yes | No |  |  |  |  |
| 1.4. Is the interpretation of results sufficiently substantiated by data? | Yes | No |  |  |  |  |
| 1.5. Is there coherence between qualitative data sources, collection, analysis and interpretation? | Yes | No |  |  |  |  |
| 2. Quantitative randomized controlled trials | 2.1. Is randomization appropriately performed? | Can’t tell |  | Can’t tell | Yes |  |  |
| 2.2. Are the groups comparable at baseline? | Yes |  | Yes | Can’t tell |  |  |
| 2.3. Are there complete outcome data? | Yes |  | Yes | Yes |  |  |
| 2.4. Are outcome assessors blinded to the intervention provided? | No |  | No | Yes |  |  |
| 2.5 Did the participants adhere to the assigned intervention? | Yes |  | Yes | Yes |  |  |
| 3. Quantitative non-randomized | 3.1. Are the participants representative of the target population? |  | No |  |  | No | No |
| 3.2. Are measurements appropriate regarding both the outcome and intervention (or exposure)? |  | No |  |  | No | No |
| 3.3. Are there complete outcome data? |  | Yes |  |  | Yes | Yes |
| 3.4. Are the confounders accounted for in the design and analysis? |  | No |  |  | No | No |
| 3.5. During the study period, is the intervention administered (or exposure occurred) as intended? |  | Yes |  |  | Yes | Yes |
| 4. Mixed methods | 4.1. Is there an adequate rationale for using a mixed methods design to address the research question? | Yes | No |  |  |  |  |
| 4.2. Are the different components of the study effectively integrated to answer the research question? | Yes | No |  |  |  |  |
| 4.3. Are the outputs of the integration of qualitative and quantitative components adequately interpreted? | Yes | No |  |  |  |  |
| 4.4. Are divergences and inconsistencies between quantitative and qualitative results adequately addressed? | Yes | No |  |  |  |  |
| 4.5. Do the different components of the study adhere to the quality criteria of each tradition of the methods involved? | No | No |  |  |  |  |
| Overall quality score* | | 60% | 0% | 60% | 80% | 40% | 40% |

* The overall quality score is the percentage of criteria met. For mixed methods studies, the overall quality score is the lowest score of the study components.
